# Supplementary material for: In vivo protein tyrosine nitration in Arabidopsis thaliana
Source: PubMed Central journal article supplement — J Exp Bot. 2011 Mar 4;62(10):3501–17. doi: 10.1093/jxb/err042 (PMC3130175; doi:10.1093/jxb/err042), 2011-03-04

## Supplementary Data

**Title:** *In vivo* protein tyrosine nitration in *Arabidopsis thaliana*

**Authors:** Jorge Lozano-Juste, Rosa Colom-Moreno and José León

**Affiliation:** Instituto de Biología Molecular y Celular de Plantas, CSIC-Universidad  
Politécnica de Valencia, CPI Ed. 8E, Camino de Vera s/n, 46022  
Valencia, Spain

## Supplementary data

Supplementary data are available at *JXB* online.

**Table S1.** Putative Y-nitrated proteins identified from Arabidopsis and the corresponding functional Y-nitrated counterparts in other organisms.

**Table S2.** Identification of potentially Y nitrated proteins by MALDI-TOF peptide fingerprinting of the most abundant 2D gel-excised spots from anti-3-nitroY-immunoprecipitated Arabidopsis proteins.

**Table S3.** Identification of potential targets of 3-amino-Y modification by shotgun LC-MS/MS analysis.

**Fig. S1.** Potential Y nitration targets in glyceraldehyde-3-phosphate dehydrogenase, serine hydroxymethyltransferase, transketolase, Rubisco large subunit and Rubisco activase are conserved in different plants and other organisms.

**Fig. S2.** Conservation and structural modeling analysis of plant methionine synthases.

**Fig. S3.** Alignment of 3D structure models of rat and Arabidopsis glyceraldehyde-3-phosphate dehydrogenases.

**Fig. S4.** Scheme displaying primary carbon and sulphur metabolism enzymes highlighting those that have been identified in this work as potentially nitrated in Arabidopsis.

**Fig. S5.** Confirmation of the presence of proteins identified through shotgun proteomic analysis in the immunopurified nitroproteome. The entire gels for Western blots performed in Fig. 2 are shown to account for specificity of the antibodies.

**Fig. S6.** ROS and NO detection in roots of wild type plants grown under standard conditions. Nitroblue tetrazolium (NBT) staining of roots at different zones

(A,B). Roots were pre-incubated with 10 U/mL of superoxide dismutase (SOD) prior to NBT staining (C,D). DAF-FM DA staining of roots pre-treated (G,H) or not (E,F) with the NO scavenger cPTIO under UV-illumination (E,G) or bright field (F,H).

**Table S1.** Putative Y-nitrated proteins identified from Arabidopsis and the corresponding functional Y-nitrated counterparts in other organisms.

| Identified Arabidopsis protein (AGI locus) | Protein (Organism)                                              | References                                                    |                                   |                                        |
|--------------------------------------------|-----------------------------------------------------------------|---------------------------------------------------------------|-----------------------------------|----------------------------------------|
| TCPA_ARATH (At3g20050)                     | T-complex polypeptide 1 alpha subunit TCP-1 (Rat ; Human)       | Suzuki et al., 2005                                           |                                   |                                        |
| G3PB_ARATH (At1g42970)                     | Glyceraldehyde-3-phosphate dehydrogenases (Human; Rat)          | Guesquière et al., 2009                                       |                                   |                                        |
| G3PA_ARATH (At3g26650)                     |                                                                 | Sultana et al., 2006                                          |                                   |                                        |
| G3PC_ARATH (At3g04120)                     |                                                                 | Guesquière et al., 2009                                       |                                   |                                        |
| ATPA_ARATH (AtCg00120)                     | ATP synthases (Human ; Mouse)                                   | Casoni et al., 2005; Sultana et al., 2006; Zhang et al., 2007 |                                   |                                        |
| ATPB_ARATH (AtCg00480)                     |                                                                 |                                                               |                                   |                                        |
| ATPG1_ARATH (At4g04640)                    |                                                                 |                                                               |                                   |                                        |
| VATB_ARATH (At1g76030)                     |                                                                 |                                                               |                                   |                                        |
| CAHC_ARATH (At3g01500)                     |                                                                 |                                                               |                                   |                                        |
| CAH2_ARATH (At5g14740)                     | Carbonic anhydrases (Human)                                     | Sultana et al., 2006                                          |                                   |                                        |
| ENO_ARATH (At2g36530)                      | Enolase (Mouse; Human)                                          | Casoni et al., 2005; Sultana et al., 2006                     |                                   |                                        |
| CATA3_ARATH (At1g20620)                    | Catalase (Mouse)                                                |                                                               |                                   |                                        |
| PGKH_ARATH (At1g56190)                     | 3-phosphoglycerate kinase (Yeast ; Human)                       | Ghosh et al., 2006                                            |                                   |                                        |
| ACA9_ARATH (At3g21180)                     | Ca-ATPase (Rat)                                                 | Bacharach et al., 1977                                        |                                   |                                        |
| HDA5_ARATH (At5g61060)                     | Histone deacetylase HDAC2 (mammals cells)                       | Guesquière et al., 2009                                       |                                   |                                        |
| ACT7_ARATH (At5g09810)                     | Actins (mammals cells ; Mouse)                                  | Knyushko et al., 2005                                         |                                   |                                        |
| ACT2_ARATH (At3g18780)                     |                                                                 | Ito et al., 2004                                              |                                   |                                        |
| TBA6_ARATH (At4g14960)                     | Tubulins (Pig; Human ; mammals cells; Mouse)                    | Casoni et al., 2005; Zhang et al., 2007                       |                                   |                                        |
| TBA3_ARATH (At5g19770)                     |                                                                 |                                                               |                                   |                                        |
| TBB4_ARATH (At5g44340)                     |                                                                 |                                                               |                                   |                                        |
| TBB2_ARATH (At5g62690)                     |                                                                 |                                                               |                                   |                                        |
| TBB1_ARATH (At1g75780)                     |                                                                 |                                                               |                                   |                                        |
| GLNA2_ARATH (At5g35630)                    |                                                                 |                                                               | Glutamine synthetase (Rat; Mouse) | Fiore et al., 2006; Zhang et al., 2007 |
| TYW23_ARATH (At4g04670)                    |                                                                 |                                                               | t-RNA synthetases (Human)         | Görg et al., 2006; Zhang et al., 2007  |
| SYV_ARATH (At1g67220)                      |                                                                 |                                                               |                                   | Guesquière et al., 2009                |
| SYM_ARATH (At4g13780)                      |                                                                 |                                                               |                                   |                                        |
| HSP83_ARATH (At5g56010)                    | Heat shock protein 90 (mammals cells, Mouse)                    | Zhang et al., 2007                                            |                                   |                                        |
| HSP71_ARATH (At5g02500)                    | Heat shock 71-kDa protein (Mouse)                               | Casoni et al., 2005; Zhang et al., 2007                       |                                   |                                        |
| HSP73_ARATH (At3g09440)                    | Aspartate aminotransferase (Cow; Mouse)                         | DiCola et al., 1976; Zhang et al., 2007                       |                                   |                                        |
| AAT5_ARATH (At4g31990)                     |                                                                 |                                                               |                                   |                                        |
| MDHP_ARATH (At3g47520)                     | Malate:NADP <sup>+</sup> oxidoreductases (Pigeon; Mouse, Human) | Chang et al., 1980; Zhang et al., 2007                        |                                   |                                        |
| MDHG1_ARATH (At5g09660)                    |                                                                 |                                                               |                                   |                                        |
| RH56_ARATH (At5g11200)                     | ATP-dependent RNA helicase (Human)                              | Guesquière et al., 2009                                       |                                   |                                        |
| FBX10_ARATH (At1g51290)                    | F-Box proteins (Human)                                          | Guesquière et al., 2009                                       |                                   |                                        |
| FBK84_ARATH (At4g19865)                    |                                                                 |                                                               |                                   |                                        |
| FBK19_ARATH (At1g32430)                    |                                                                 |                                                               |                                   |                                        |
| EF1A_ARATH (At1g07940)                     | Elongation factor 1-alpha (Human)                               | Guesquière et al., 2009                                       |                                   |                                        |
| PGMP_ARATH (At5g51820)                     | Phosphoglucomutase (Rabbit)                                     | Layne et al., 1979                                            |                                   |                                        |
| 2AAA_ARATH (At1g25490)                     | Ser/Thr-protein phosphatase (Human)                             | Guesquière et al., 2009                                       |                                   |                                        |
| IF5A2_ARATH (At1g26630)                    | Eukaryotic translation initiation factor (Human)                | Guesquière et al., 2009                                       |                                   |                                        |
| PGKH_ARATH (At1g56190)                     | PGK1 Protein (Mouse)                                            | Zhang et al., 2007                                            |                                   |                                        |
| WBC16_ARATH (At3g55090)                    | ABC transporter                                                 | Guesquière et al., 2009                                       |                                   |                                        |
| GBLP_ARATH (At1g18080)                     | Guanine nucleotide-binding protein beta (Human)                 | Guesquière et al., 2009                                       |                                   |                                        |
| DRP1D_ARATH (At2g44590)                    | Dynamin (Mouse)                                                 | Zhang et al., 2007                                            |                                   |                                        |
| GBLP_ARATH (At1g18080)                     | Guanine Nucleotide Binding Protein (Mouse)                      | Zhang et al., 2007                                            |                                   |                                        |
| SCP37_ARATH (At3g52010)                    | Carboxypeptidase (Bovine)                                       | Zisapel 1978                                                  |                                   |                                        |

The Y-nitrated proteins identified by LC-MS/MS in immunopurified samples from Arabidopsis seedlings and the corresponding counterparts from different organisms in parenthesis in the second column.

**Table S2.** Identification of potentially Y nitrated proteins by MALDI-TOF peptide fingerprinting of the most abundant 2D gel-excised spots from anti-3-nitroY-immunoprecipitated Arabidopsis proteins.

| Description                                                             | AGI code  | Mr Theor | Mr Exper | Mascot Score | Peptides (n.r.) | Coverage (%) |
|-------------------------------------------------------------------------|-----------|----------|----------|--------------|-----------------|--------------|
| Ribulose biphosphate carboxylase large chain precursor                  | AtCg00490 | 52.9     | 53.4     | 348          | 20              | 41           |
| Ribulose biphosphate carboxylase/oxygenase activase                     | At2g39730 | 52.0     | 52.3     | 251          | 14              | 50           |
| Serine Hydroxymethyltransferase                                         | At4g13930 | 51.7     | 52.1     | 238          | 11              | 25           |
| Glyceraldehyde-3-phosphate dehydrogenase, cytosolic                     | At3g04120 | 36.9     | 37.0     | 176          | 11              | 49           |
| Trigger factor type chaperone family protein                            | At5g55220 | 61.7     | 62.1     | 120          | 11              | 27           |
| Putative microtubule-associated motor                                   | At5g60930 | 145.2    | 44.4     | 101          | 17              | 11           |
| Probable 125 kDa kinesin-related protein                                | At2g36200 | 119.3    | 120.4    | 81           | 23              | 26           |
| Carbonic anhydrase, chloroplast precursor                               | At3g01500 | 37.4     | 37.8     | 78           | 9               | 34           |
| Hypothetical 213.7 kDa protein ycf1.2                                   | AtCg01130 | 213.7    | 214.6    | 77           | 25              | 12           |
| DNA repair protein RAD50                                                | At2g31970 | 152.8    | 153.6    | 73           | 22              | 20           |
| Putative nuclear matrix constituent protein 1-like protein (NMCP1-like) | At5g65770 | 121.2    | 121.8    | 70           | 21              | 17           |
| DNA topoisomerase 1                                                     | At5g55300 | 102.8    | 103.2    | 69           | 19              | 18           |
| Mitochondrial import inner membrane translocase subunit Tim9            | At3g46560 | 10.7     | 10.9     | 67           | 8               | 78           |
| 60S ribosomal protein L3-1 (Protein EMBRYO DEFECTIVE 2207)              | At1g43170 | 44.5     | 44.7     | 65           | 11              | 23           |
| Glycosyl hydrolase family 1 protein                                     | At5g25980 | 53.4     | 54.3     | 64           | 7               | 28           |
| Glycine-rich RNA-binding protein 7                                      | At2g21660 | 16.8     | 16.9     | 64           | 9               | 78           |
| Glyceraldehyde-3-phosphate dehydrogenase C-2                            | At1g13440 | 36.9     | 36.9     | 63           | 8               | 22           |
| Transketolase, putative                                                 | At3g60750 | 79.9     | 80.3     | 62           | 12              | 34           |
| Ras-related protein ARA-4                                               | At2g43130 | 24.0     | 24.1     | 61           | 10              | 50           |
| Probable nucleolar GTP-binding protein 1                                | At1g50920 | 76.8     | 77.3     | 60           | 17              | 25           |
| Probable mannitol dehydrogenase                                         | At4g39330 | 38.9     | 39.3     | 59           | 8               | 26           |
| Protein AIG1                                                            | At1g33960 | 40.1     | 40.3     | 59           | 13              | 34           |
| Arginine/serine-rich-splicing factor RSP40                              | At4g25500 | 40.1     | 40.3     | 59           | 12              | 60           |

Samples containing 3-nitroY immunopurified proteins were separated by 2-DE and identified by MALDI-TOF as described in Materials and Methods. The AGI identifiers for each identified protein are included along with the corresponding Mascot score and

the number of peptides (n.r., non redundant) with matched sequences as well as the sequence coverage (%).





Figure S2

A

Methionine synthases

|       |                                                                      |     |
|-------|----------------------------------------------------------------------|-----|
| AtMS1 | ELESTLSGLN-VLVETVYFADI PAEAYKTLTSLKGVTAFGFDLVRGTKTLDLVKAG-FPEG       | 285 |
| AtMS2 | ELESTLSGLN-VLVETVYFADI PAEAYKTLTSLKGVTAFGFDLVRGTKTLDLVKAG-FPQG       | 285 |
| StMS  | DLESLSGLN-VLVETVYFADVPAEAFKTLTALKGVTAFGFDLVRGTQTLELIKSS-FPSG         | 285 |
| GmMS  | ELAPALSGLN-VLVETVYFADI PAEAYKTLTSLNGVTAYGFDLVRGTNTLDLIKGG-FPSG       | 285 |
| OsMS  | ELESALSGLN-VLIETVYFADI PAESYKTLTSLNSVTAYGFDLIRGSKTLDLVKSAGFPSPG      | 286 |
| HvMS  | ELESTLSGLN-VLVETVYFADVPAESYKTLTSLSSVTAYGFDLERGKTLELVKSG-FPAG         | 285 |
| ZmMS  | ELESFSGLN-VLIETVYFADI PAESYKTLTSLSGVTAYGFDLIRGAKTLDLIRSS-FPSG        | 285 |
| MET6  | YFGEQ-SNLPKITLATYFGTVVFN-LDAIKGLP-VAALHVDVFRAPPEQFDEVVAA-IGNK        | 292 |
| NcMS  | AIAAAGDAVPKVVVATYFGDIVHN-FDVLPAFSGAAGLHVDLVRNPEQLEPVLKQ-LGPN         | 288 |
|       | : . : : * . : : . . : : . . . * : * . : : : :                        |     |
| AtMS1 | <b>KYLFAGVVDGR</b> NIWANDFAASLSTLQALEGIVGKDKLVVSTSCSLLHTAVDLINETKLDD | 345 |
| AtMS2 | <b>KYLFAGVVDGR</b> NIWANDLAASLITLQSLGIVGKDKLVVSTSCSLLHTAVDLINETKLDA  | 345 |
| StMS  | <b>KYLFAGVVDGR</b> NIWANDLAASLALLQSLGIVGKDKLVASTSCSLLHTAVDLINETKLDD  | 345 |
| GmMS  | <b>KYLFAGVVDGR</b> NIWANDLAASLTTLQGLEGIVGKDKLVVSTSSSLLHTAVDLVNETKLDD | 345 |
| OsMS  | <b>KYLFAGVVDGR</b> NIWADDLAASLTTLESLEAIVGKDKLVVSTSCSLMHTAVDLVNETKLDS | 346 |
| HvMS  | <b>KYLFAGVVDGR</b> NIWADDLAASLTTLQSLGIVGKDKLVVSTSCSLMHTAVDLVNETKLDD  | 345 |
| ZmMS  | <b>KYLFAGVVDGR</b> NIWADDLAASLTLHSLEAVAGKDKLVVSTSCSLMHTAVDLVNETKLDD  | 345 |
| MET6  | QTLSVGI V DGRNIWKNDFKKSSAIVNKAIEKLGADRVVATSSSLLHTPVDLNNETKLDA        | 352 |
| NcMS  | QILSAGVVDGRNIWKNDFAKSLEILQTAVKALGSESVIVATSSSLIHTPHTLASEKKLPS         | 348 |
|       | : * . * : * * * * * : * : * . : * : : : * * * * * : * . * . * *      |     |

B

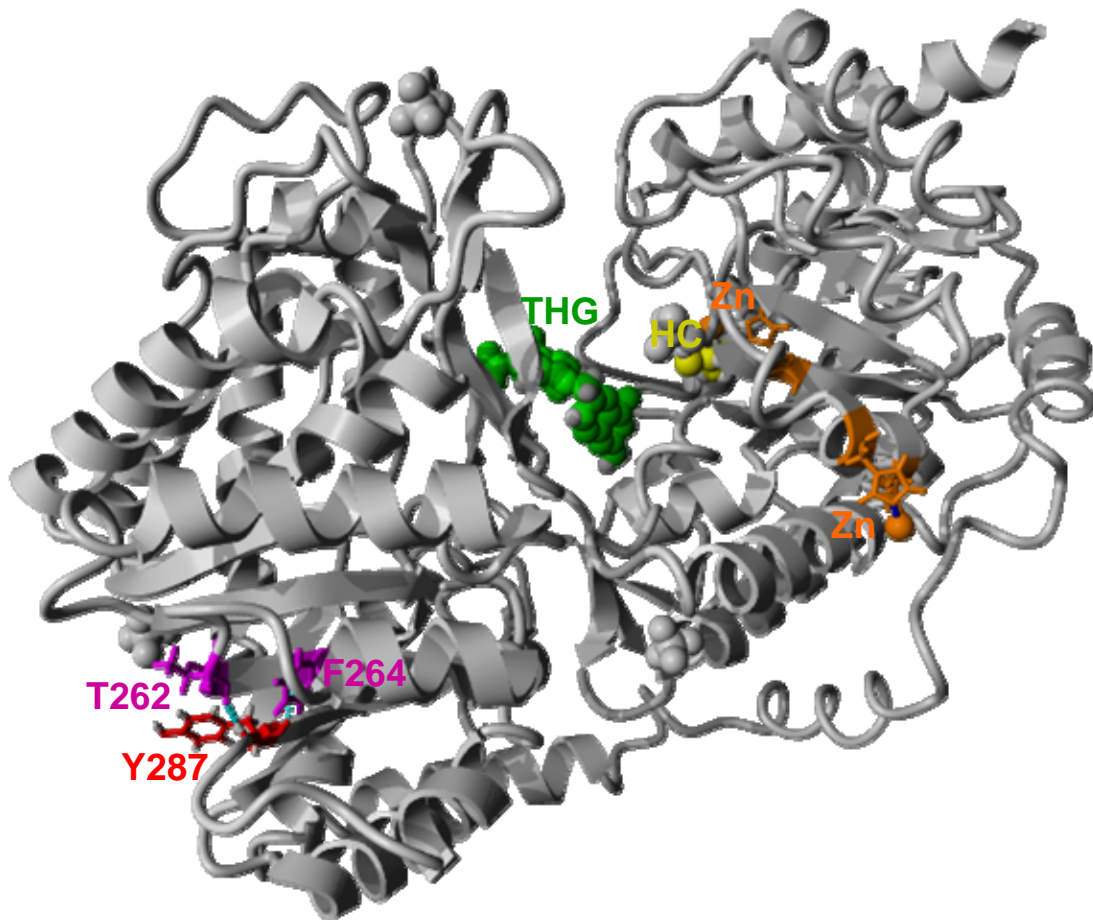

Figure S3

**A**

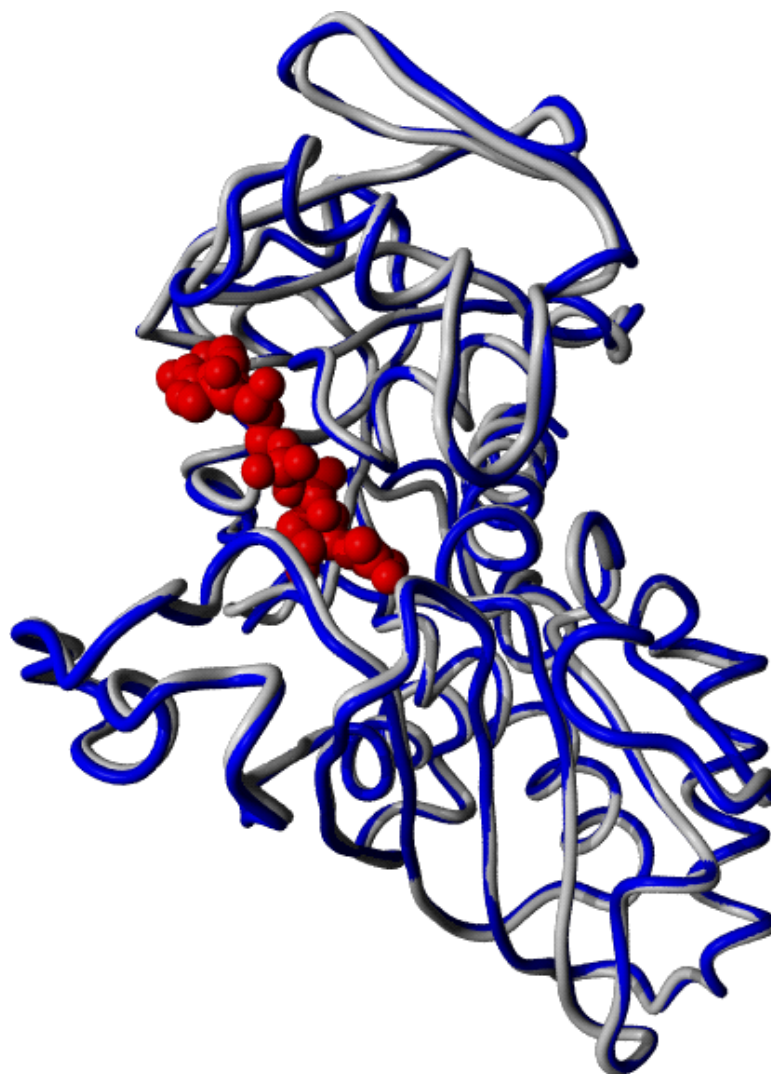

**B**

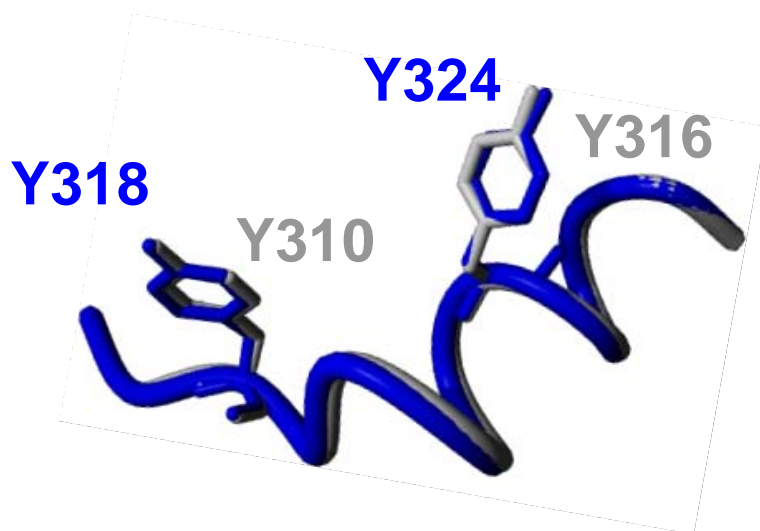

Figure S4

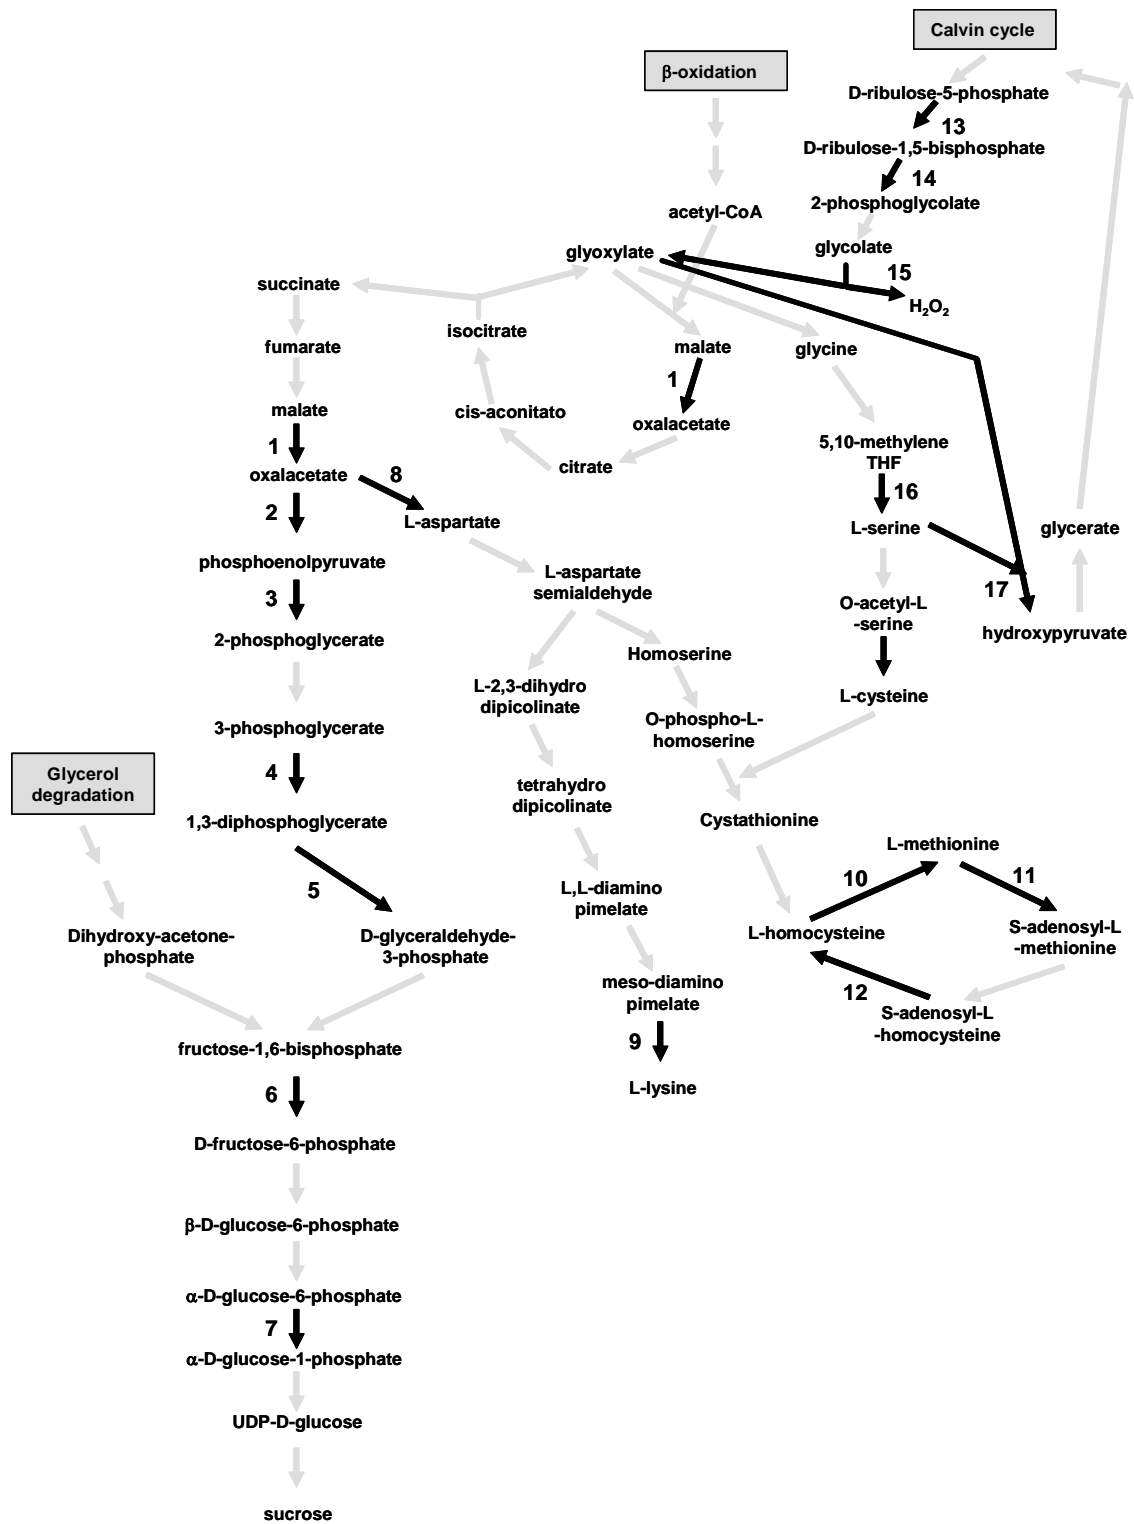

Figure S5

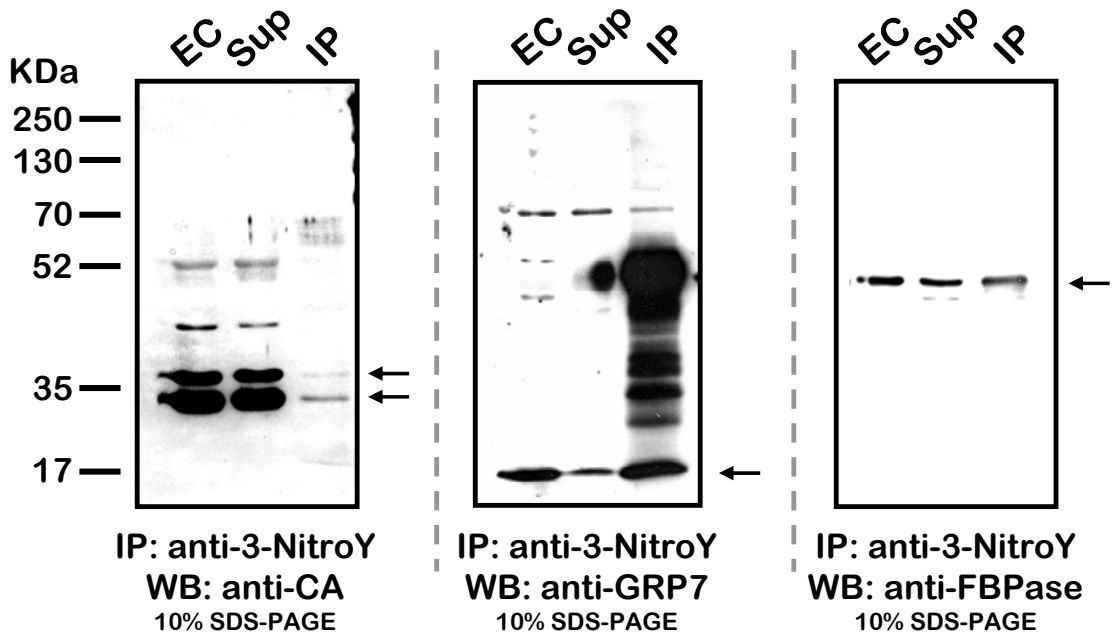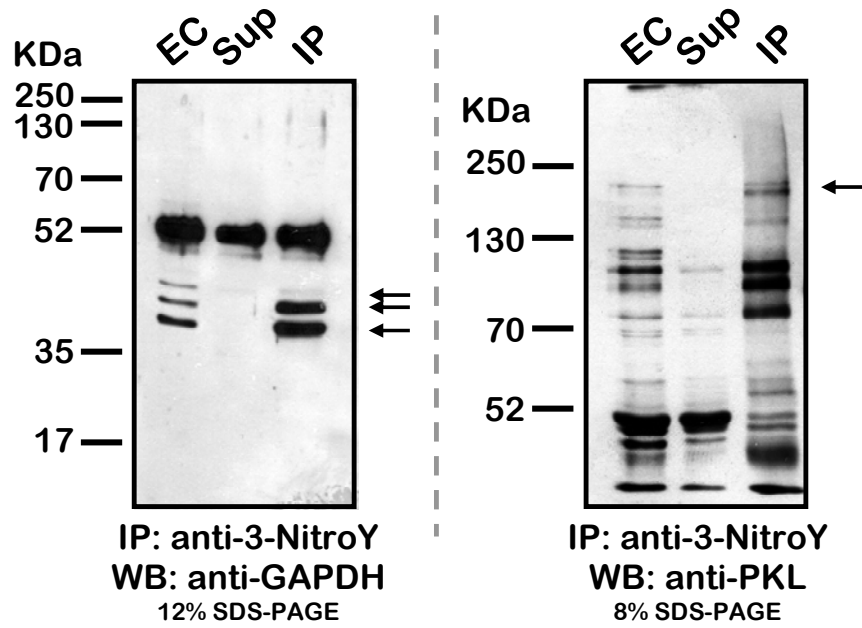

Figure S6

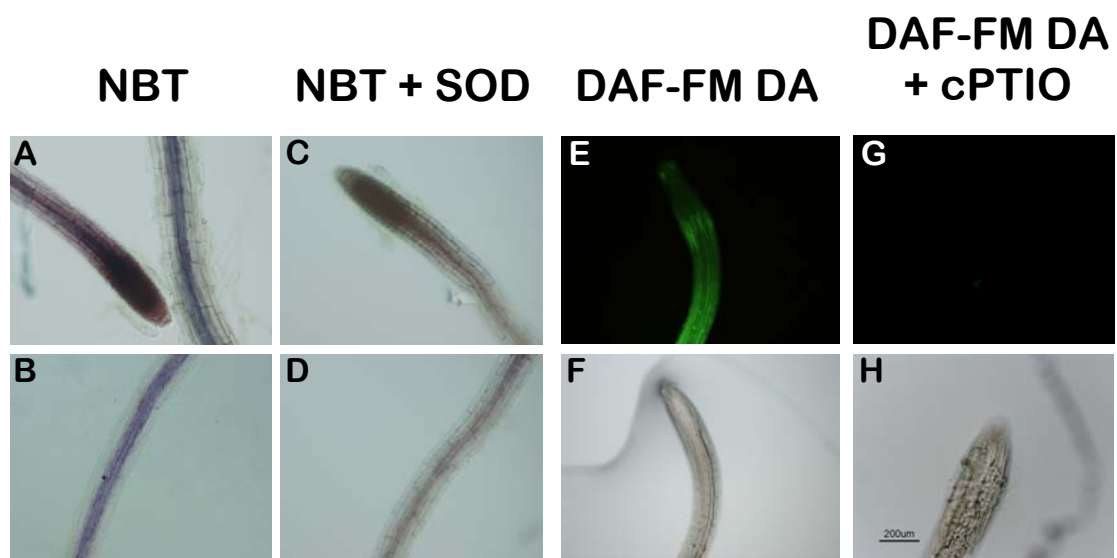

Supplement: supp_err042_00055566-file001.pdf [file supp_err042_00055566-file001.pdf]
